# Supplementary material
Source: Springer Nature journal article supplement (https://www.springermedizin.de/resource/supplementary/12906_2013_1617_MOESM4_ESM.pdf/9522632)

(A) Temporal up-pattern

● MicroRNA  
● Target symbol

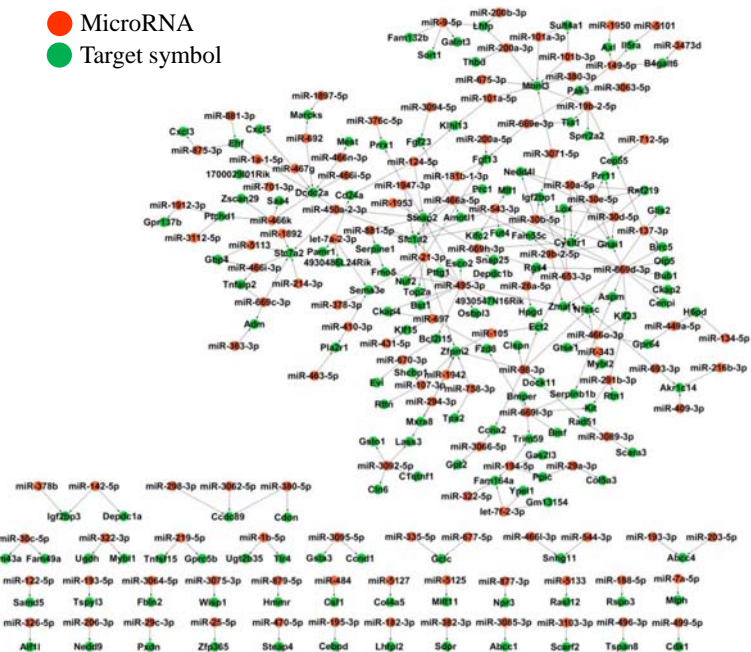

(B) Temporal down-pattern

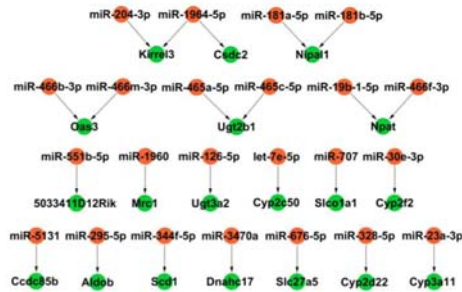

Supplement: MOESM4 [file 9522632]
